# Supplementary material for: Functional modules for visual scene segmentation in macaque visual cortex
Source: PubMed Central journal article supplement — Proc Natl Acad Sci U S A. 2023 Jul 31;120(32):e2221122120. doi: 10.1073/pnas.2221122120 (PMC10410728; doi:10.1073/pnas.2221122120), 2023-07-31
Supplement: pnas.2221122120.sapp.pdf [file pnas.2221122120.sapp.pdf]

1

2

## 3 **Supporting Information for**

### Functional modules for visual scene segmentation in macaque visual cortex

**Janis K. Hesse<sup>1,2</sup> and Doris Y. Tsao<sup>1,2,\*</sup>**

1. Department of Molecular and Cell Biology & Helen Wills Neuroscience Institute, University of California Berkeley, Berkeley, CA 94720.

2. Howard Hughes Medical Institute, Berkeley, CA 94720.

#### **\*Corresponding authors:**

Doris Y. Tsao

Professor of Biology, Investigator, HHMI

University of California, Berkeley, CA 94720, USA

Email: tsao.doris@gmail.com

**Author contributions:** JKH and DYT designed the research. JKH performed the experiments and analyzed the data. JKH and DYT wrote the paper.

**Conflict of Interest:** The authors declare no competing financial interests.

**Acknowledgments:** The work was supported by the Howard Hughes Medical Institute and the Simons Foundation.

**Classifications:** Biological Sciences, Neuroscience.

**Keywords:** segmentation; figure-ground; border-ownership; disparity; visual cortex; vision; decoding

4 **This PDF file includes:**

5 Figures S1 to S2

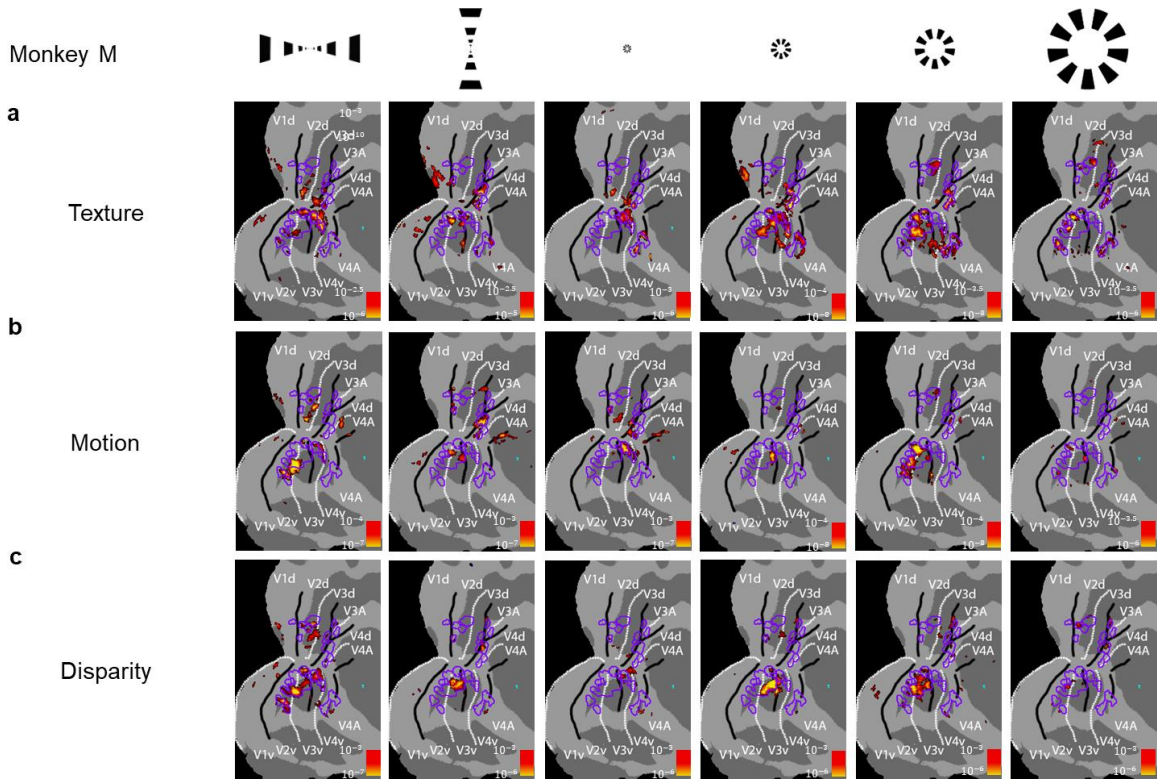

7 **Figure S1. Retinotopy of segmentation patches.** To investigate the relationship between  
 8 retinotopy and segmentation-related activation, in a separate experiment, we presented figures at  
 9 specific positions rather than spanning the entire visual field. Purple outlines indicate segmentation  
 10 patches defined by activation to a texture stimulus spanning the entire visual field, as shown in Fig.  
 11 1b. Columns from left to right indicate contrast to figures presented along the horizontal meridian,  
 12 vertical meridian, and four increasing eccentricities. Figures were defined by (a) texture, (b)  
 13 or (c) disparity.

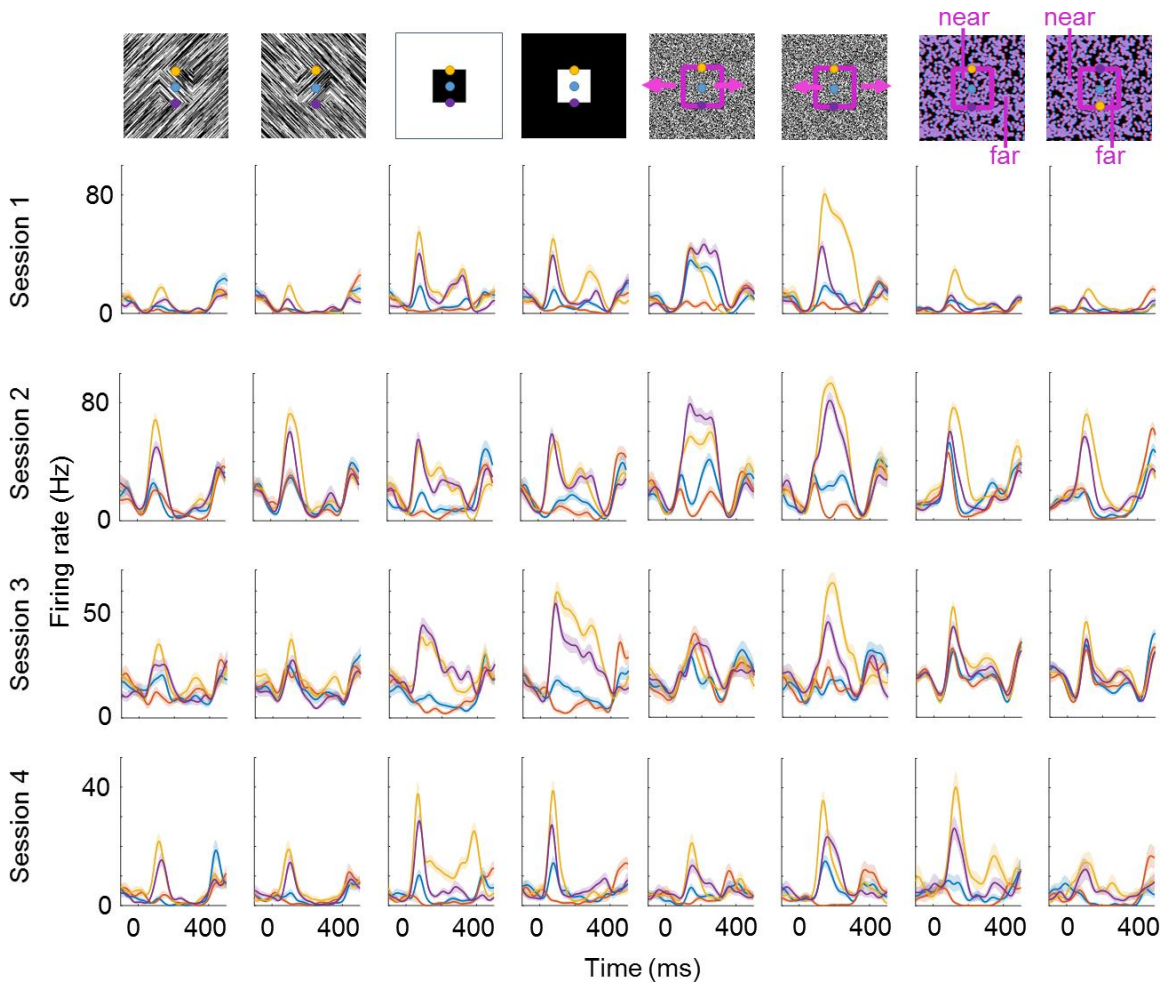

14

15 **Figure S2. Cluster of consistent border-ownership cells across days in monkey T.** See text  
 16 for details. Same conventions as in Fig. 5.

17
